# Supplementary material for: An electrochemical sensing strategy for the detection of the hepatitis B virus sequence with homogenous hybridization based on host–guest recognition
Source: Royal Society of Chemistry journal article supplement (doi:10.1039/c5ra16204a), 2015-01-01
Supplement: c5ra16204a1.pdf [file c5ra16204a1.pdf]

## Support Information

An electrochemical sensing strategy for the detection of hepatitis B virus sequence  
with homogenous hybridization based on the host-guest recognition

Jing Zheng<sup>1a,b</sup>, Liping Hu<sup>a</sup>, Min Zhang<sup>a</sup>, Jingli Xu<sup>a</sup>, Pingang He<sup>b</sup>

<sup>a</sup> Department of Chemistry & Chemical Engineering, Shanghai University of Engineering Science,  
Shanghai, 201620, P.R. China

<sup>b</sup> Department of Chemistry, East China Normal University, Shanghai, 200062, P.R. China

Corresponding author at: the Department of Chemistry & Chemical Engineering, Shanghai University of  
Engineering Science, Shanghai 201620, China. Tel: +86 21 67791214.

*E-mail address:* [kkzhengjing707@163.com](mailto:kkzhengjing707@163.com) (Jing Zheng)

This supporting information contains 3 Figures. This document contains 3 pages,  
including this cover page.

---

<sup>1</sup> Corresponding author at: the Department of Chemistry & Chemical Engineering, Shanghai University of  
Engineering Science, Shanghai 201620, China. Tel: +86 21 67791214.

*E-mail address:* [kkzhengjing707@163.com](mailto:kkzhengjing707@163.com) (Jing Zheng)

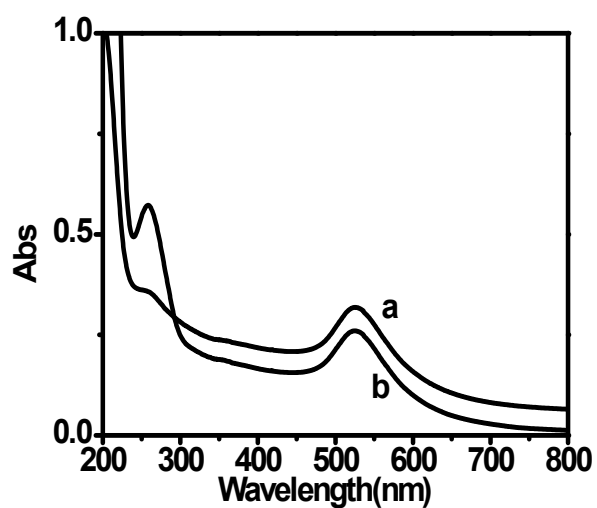

Fig.S1: The UV-vis spectra of Au nanoparticle (a) and the Au nanoparticle-labeled probe DNA (b)

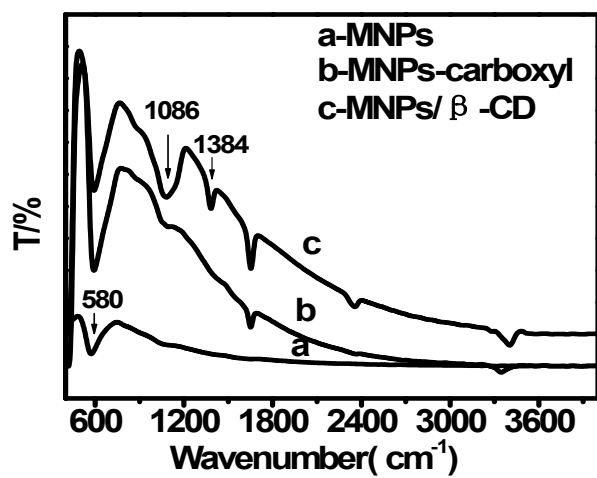

Fig.S2: FT-IR spectra of MNPs (a), MNPs- carboxyl (b) and MNPs/β-CD (c)

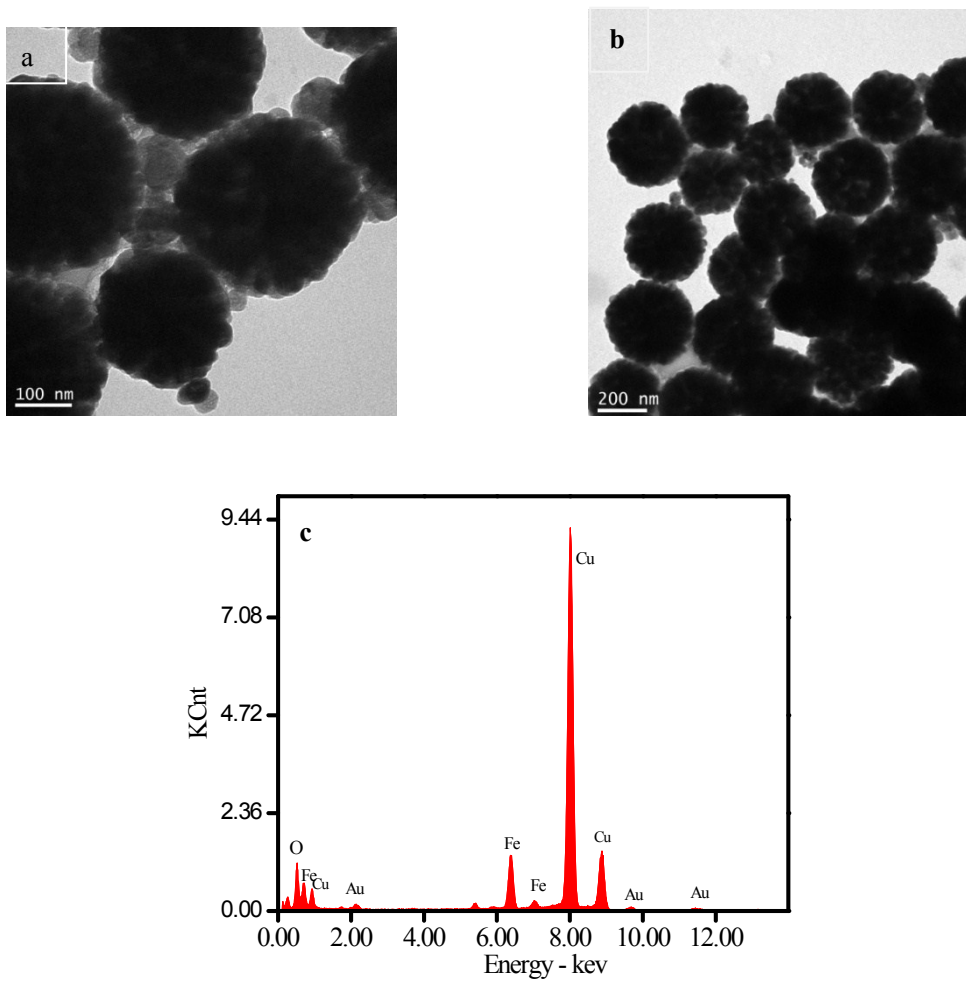

Fig. S3: TEM images of MNPs/ $\beta$ -CD-target DNA-/probe DNA/Au nanoparticles conjugates (a)

scale 200 nm, (b) scale 100 nm (c) EDX analysis of the conjugate
